# Supplementary material
Source: Springer Nature journal article supplement (https://www.springermedizin.de/resource/supplementary/12874_2011_613_MOESM6_ESM.pdf/9432580)

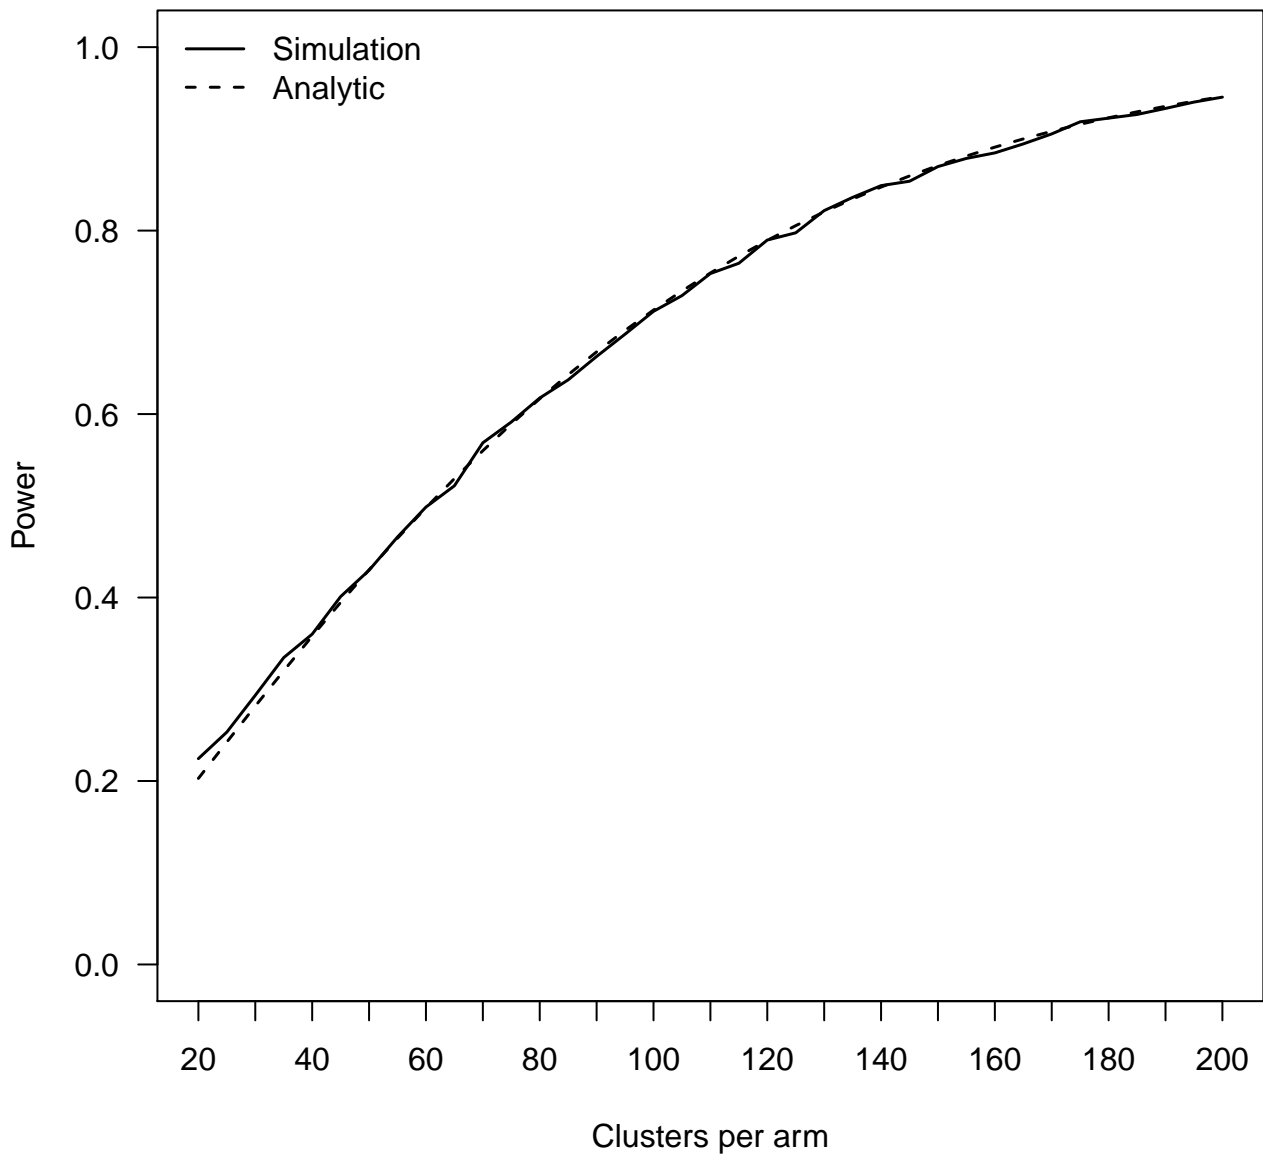

Supplement: MOESM6 [file 9432580]
